# Supplementary material for: Unsupervised segmentation of mass spectrometric ion images characterizes morphology of tissues
Source: PubMed Central journal article supplement — Bioinformatics. 2019 Jul 5;35(14):i208–17. doi: 10.1093/bioinformatics/btz345 (PMC6612871; doi:10.1093/bioinformatics/btz345), 2019-07-05
Supplement: btz345_supplementary_data.pdf [file btz345_supplementary_data.pdf]

# Unsupervised segmentation of mass spectrometric ion images characterizes morphology of tissues: *Supplementary material*

Dan Guo<sup>1</sup>, Kylie Bemis<sup>1</sup>, Catherine Rawlins<sup>2</sup>, Jeffery Agar<sup>2</sup> and Olga Vitek<sup>1,\*</sup>

<sup>1</sup>Khoury College of Computer and Information Sciences, Northeastern University, Boston MA, 02115, USA and

<sup>2</sup>Department of Chemistry and Chemical Biology, Northeastern University, Boston MA, 02115, USA

\*To whom correspondence should be addressed

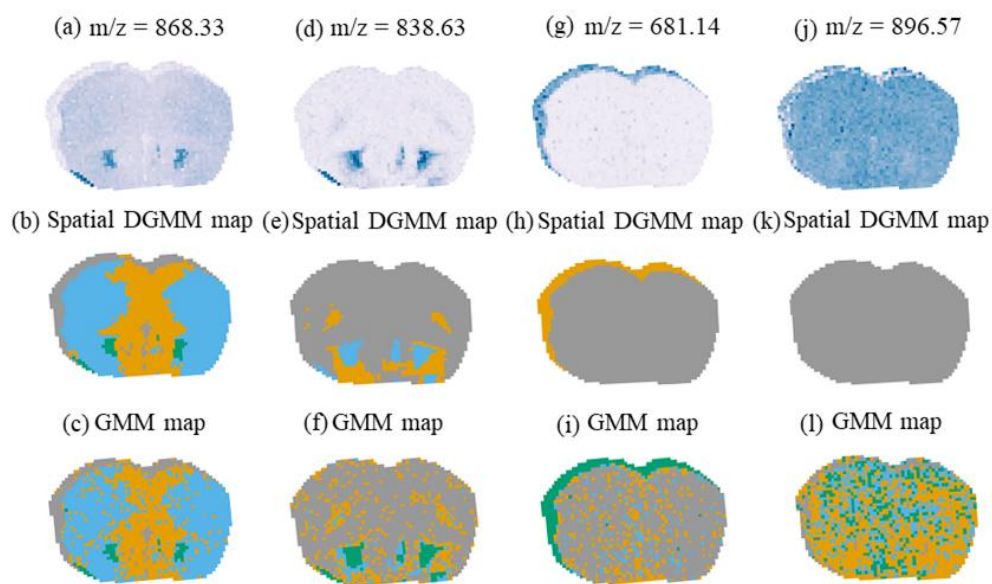

Figure S1. Ion images (a, d, g, j), spatial DGMM maps (b, e, h, k) and GMM maps (c, f, i, l) of m/z 868.33, 838.63, 681.14, 896.57 respectively from ALS mouse brain data.

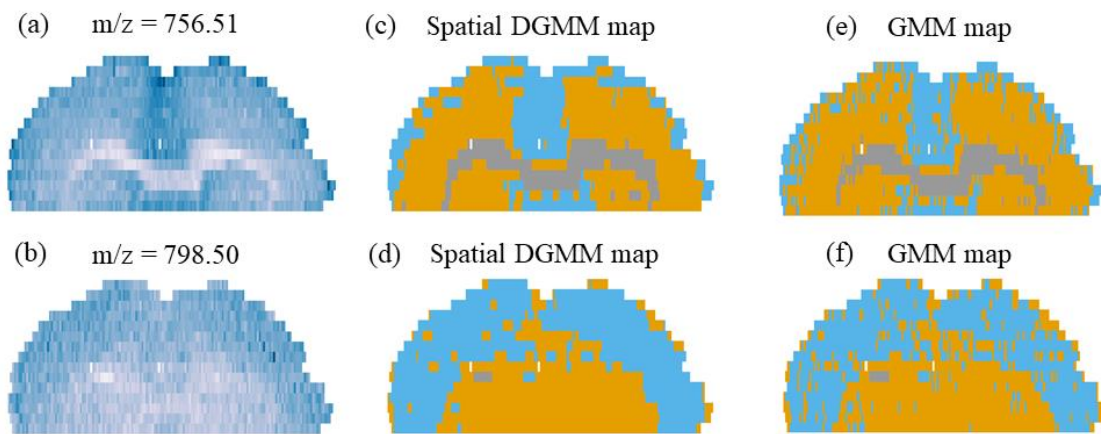

Figure S2. Ion image (a, d, g, j), spatial DGMM map (b, e, h, k) and GMM map (c, f, i, l) of  $m/z$  868.33, 838.63, 681.14, 896.57 respectively from CpG preconditioned mouse brain data.
